# Supplementary material for: The circular RNA circSPARC enhances the migration and proliferation of colorectal cancer by regulating the JAK/STAT pathway
Source: PubMed Central journal article supplement (PMC8167978; doi:10.1186/s12943-021-01375-x), 2021-06-01

**A**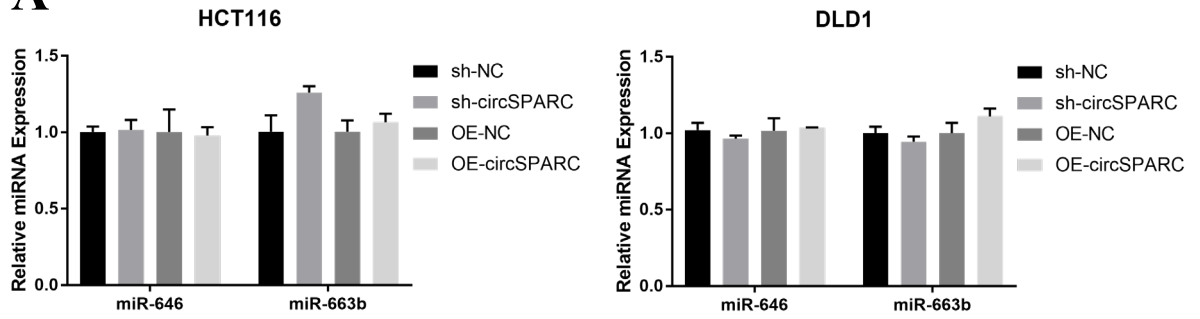**B**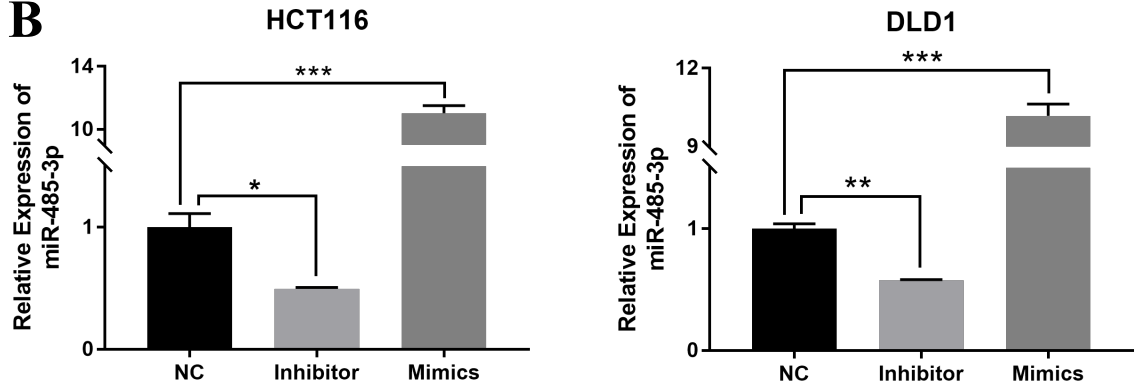**C**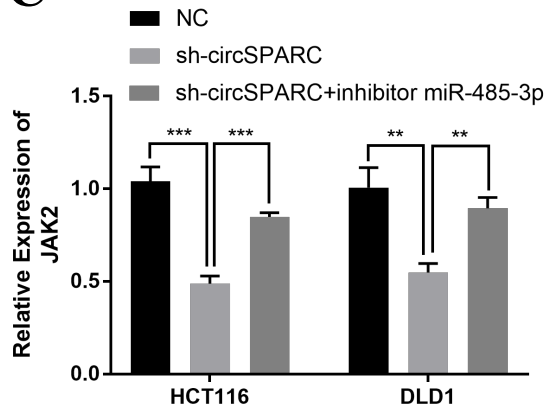**D**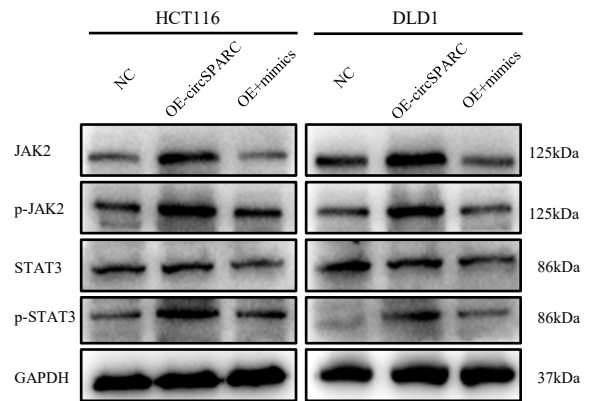**E**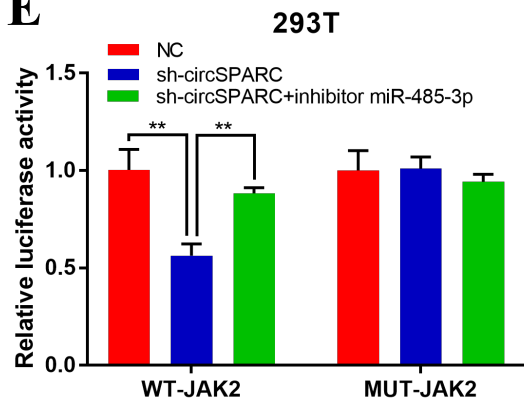

Supplement: 12943_2021_1375_MOESM3_ESM.pdf [file 12943_2021_1375_MOESM3_ESM.pdf]
